# Supplementary material
Source: MDPI journal article supplement (https://www.mdpi.com/2673-9992/14/1/59)
Supplement: s1 [file s1]

# In vitro cytotoxicity of 7,3',4'-trihydroxyflavones in lung fibroblasts

Isabela Santos<sup>a\*</sup>, Hélio M. T. Albuquerque<sup>b</sup>, Artur M. S. Silva<sup>b</sup>, Eduarda Fernandes<sup>a</sup>, José Miguel P. Ferreira de Oliveira<sup>a</sup>

<sup>a</sup>LAQV, REQUIMTE, Laboratory of Applied Chemistry, Department of Chemical Sciences, Faculty of Pharmacy, University of Porto, 4050-313 Porto, Portugal.

<sup>b</sup>LAQV, REQUIMTE, Laboratory of Applied Chemistry, Department of Chemistry, Campus Universitario de Santiago, University of Aveiro, 3810-193 Aveiro, Portugal

\*Email: [up202112015@ff.up.pt](mailto:up202112015@ff.up.pt)

## Introduction

Cancer is the second leading cause of death worldwide<sup>1</sup>. Nowadays, the current therapeutic approaches include surgery and a combination of chemotherapy with radiotherapy<sup>1</sup>. These strategies are associated with adverse side effects and may become less efficient over time. Thus, the research to find new more effective and safer anticancer agents may have huge societal impact. In this scope, flavonoids, a class of natural products with medicinal benefits, are being widely explored as they enclose a wide range of biological activities such as anti-inflammatory, anticancer and antioxidant<sup>3,4,5</sup>. The majority of the *in vitro* studies report the cytotoxic effects of flavonoids in cancer cell lines<sup>4</sup>. However, their corresponding effects in healthy cell lines are to unveil.

## Aim

The present work aims to evaluate the cytotoxic effects of flavonoids hydroxylated at positions C-7, C-3' and C-4', in human lung fibroblasts, following the assessment of cell viability and growth.

## Methods

### Evaluation of cell viability – WST-8 assay:

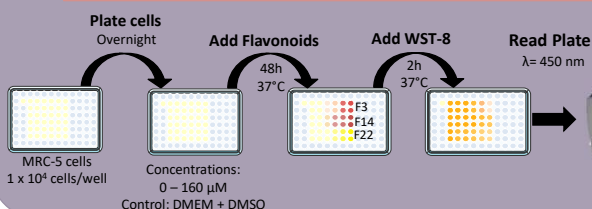

### Evaluation of cell growth – Sulforhodamine B (SRB):

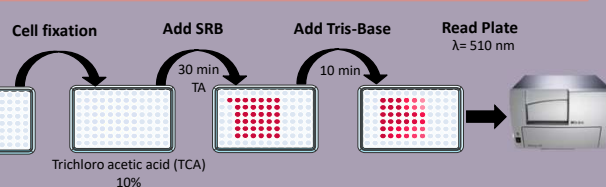

## Results

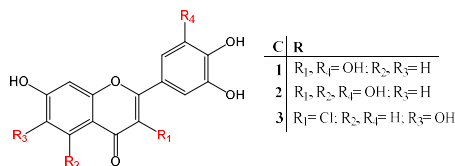

Figure 1. Chemical structure of the flavonoids used in the cytotoxicity assays.

Table 1. Half maximal inhibitory concentration (IC<sub>50</sub>) values of C1, C2 and C3. Cells were exposed to the mentioned flavonoids for 48 h and IC<sub>50</sub> values were determined following WST-8 and SRB assays.

| Compounds tested | IC <sub>50</sub> (μmol/L) ± SEM <sup>1</sup> |           |
|------------------|----------------------------------------------|-----------|
|                  | WST-8 assay                                  | SRB assay |
| C1               | 65 ± 7                                       | 57 ± 6    |
| C2               | 71 ± 26                                      | 66 ± 24   |
| C3               | 82 ± 12                                      | 59 ± 18   |

<sup>1</sup>SEM- Standard Error of Mean

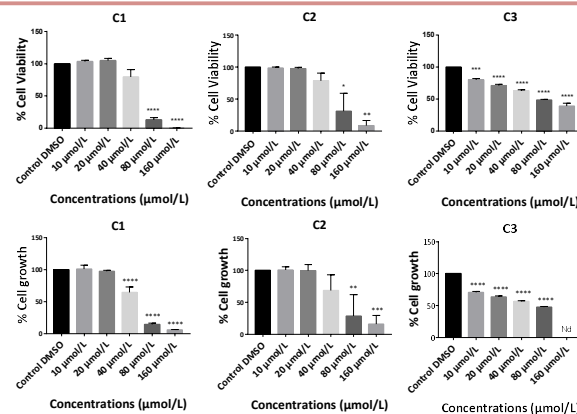

Figure 2. Cytotoxic effects of flavonoids (C1, C2 and C3) in MRC-5 cells. Cells were analyzed for cytotoxicity by WST-8 (cell viability panels) and SRB (cell growth panels) assay. The data are mean ± SEM (n ≥ 3). Nd- no differences. Significant differences (asterisks) are shown relative to 0.1% DMSO control; \* p < 0.05, \*\* p < 0.01, \*\*\* p < 0.001, and \*\*\*\* p < 0.0001 (one-way ANOVA).

## Conclusions

- Structurally similar compounds C1 and C2, presented no cytotoxic effects at 10 and 20 μmol/L, while C3 presented cytotoxic effects from 10 μmol/L. Moreover, compared to incubation with C1 compound, incubation with C2 compound, hydroxylated at C-5, was less cytotoxic at higher doses.
- Despite the differences in cytotoxicity profiles, the IC<sub>50</sub> values determined were similar between compounds.
- The low toxicity compounds identified can serve as basis for the design of novel and safer anticancer agents.

## Acknowledgments

This work received financial support from the European Union (FEDER funds through COMPETE POIG-01-0145-FEDER-029243) and National Funds (FCT, Fundação para a Ciência e Tecnologia) through project PTDC/MED-QUI/29243/2017 and from PT national funds (FCT/MCTES) through grant UIDB/50006/2020. IMPFO thanks FCT for funding through program DL 57/2016 - Norma transitória (ref. SFRH/BPD/74868/2010). IS thanks FCT for the financial support for the PhD grant (UI/BD/153618/2022), through the PhD Programme in Sustainable Chemistry.

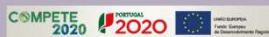

## References

- Ferlay, J.; Colombet, M.; Soerjomataram, I.; Parkin, D. M.; Piñeros, M.; Znaor, A.; Bray, F. Cancer Statistics for the Year 2020: An Overview. *Int. J. Cancer* **2021**, *149* (4), 778–789. <https://doi.org/10.1002/IJC.33588>.
- Schirmacher, V. From chemotherapy to biological therapy: A review of novel concepts to reduce the side effects of systemic cancer treatment (Review). *Int. J. Oncol.* **2019**, *54*(2), 407–419. doi: 10.3892/ijo.2018.4661.
- Panche, A. N.; Dwan, A. D.; Chandin, S. R. Flavonoids: An Overview. *J. Nutr. Sci.* **2016**, *5*, 1–15. <https://doi.org/10.1017/jns.2016.41>.
- Ferreira de Oliveira, J. M. P.; Santos, C.; Fernandes, E. Therapeutic Potential of Hesperidin and Its Aglycone Hesperetin: Cell Cycle Regulation and Apoptosis Induction in Cancer Models. *Phytochemistry* **2020**, *73*. <https://doi.org/10.1016/j.phytochem.2019.152887>.
- Kopustinskiene, D. M.; Janktas, V.; Savickas, A.; Bernatoniene, J. Flavonoids as Anticancer Agents. *Nutrients* **2020**, *12* (2), 1–24. <https://doi.org/10.3390/nu12020457>.
